# Supplementary material
Source: publisher figshare collection journal article supplement (https://springernature.figshare.com/ndownloader/files/13524920)
Supplement: Supplementary file 1 [file 13524920]

## Sheet: 41
Additional file 41: Table S41 Urine volume, by age & sex, 2016
		<45	45≤,<60	60≤,<75	75≤	Subtotal
Male	Mean	788.6	804.7	795.53	702.94	777.84
	S.D.	732.1	621.61	581.32	471.35	585.59
Female	Female	549.96	678.1	718.54	612.9	665.01
	Mean	583.55	548.39	550.49	446.26	531.39
Population: PD patients excluding PD+HD combination
* The above data were obtained from the patient survey.
